# Supplementary material for: A novel 3D structured reduced graphene oxide/TiO2 composite: synthesis and photocatalytic performance
Source: Royal Society of Chemistry journal article supplement (doi:10.1039/c3ta14718e), 2013-12-11
Supplement: c3ta14718e.pdf [file c3ta14718e.pdf]

## Electronic Supporting Information

### **A novel 3D structured reduced graphene oxide/TiO<sub>2</sub> composite: synthesis and photocatalytic performance**

**Wang Yan,<sup>a</sup> Fei He,<sup>a</sup> Shili Gai,<sup>a</sup> Peng Gao,<sup>\*a</sup> Yujin Chen<sup>\*b</sup> and Piaoping Yang<sup>\*a</sup>**

*<sup>a</sup> Key Laboratory of Superlight Materials and Surface Technology, Ministry of Education, College of Materials Science and Chemical Engineering, Harbin Engineering University, Harbin 150001, P. R. China.*

*<sup>b</sup> College of Science, Harbin Engineering University, Harbin, 150001, P. R. China.*

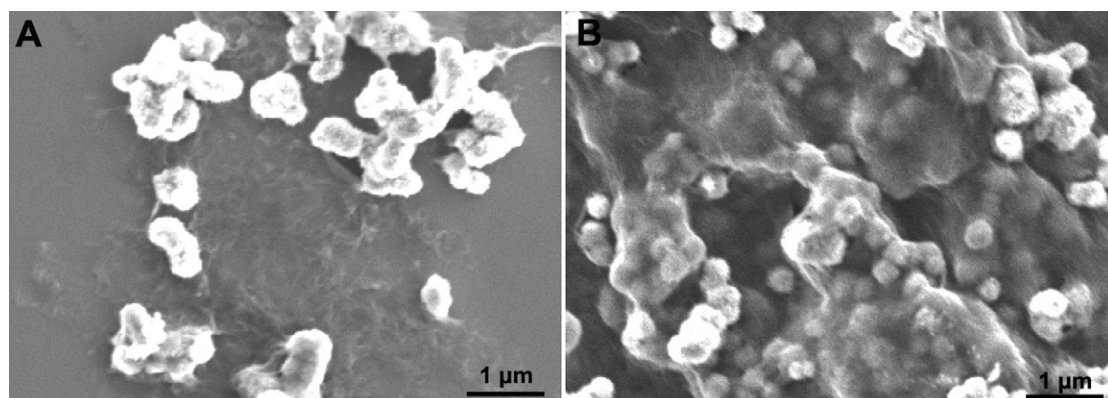

**Fig. S1.** SEM images of simply mixed rGO and TiO<sub>2</sub> (A), SEM images of rGO/ TiO<sub>2</sub> composite (B).
